# Supplementary material for: Efficacy of EZH2 inhibitory drugs in human papillomavirus-positive and human papillomavirus-negative oropharyngeal squamous cell carcinomas
Source: PubMed Central journal article supplement (PMC5586065; doi:10.1186/s13148-017-0390-y), 2017-09-06
Supplement: 13148_2017_390_MOESM6_ESM.pdf [file 13148_2017_390_MOESM6_ESM.pdf]

# SCC-47

0 Hours

12 Hours

24 Hours

36 Hours

48 Hours

60 Hours

72 Hours

No Treatment

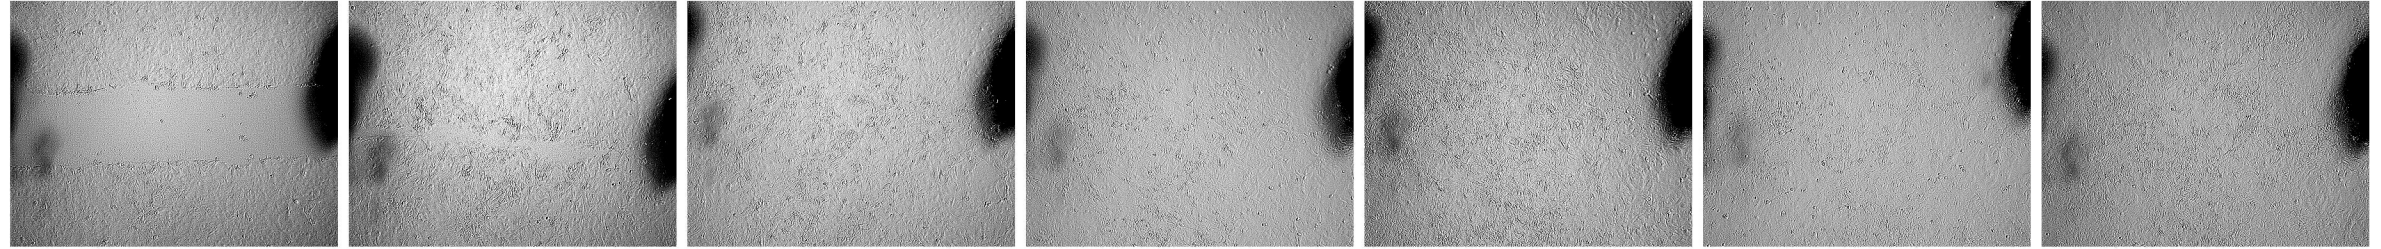

DMSO

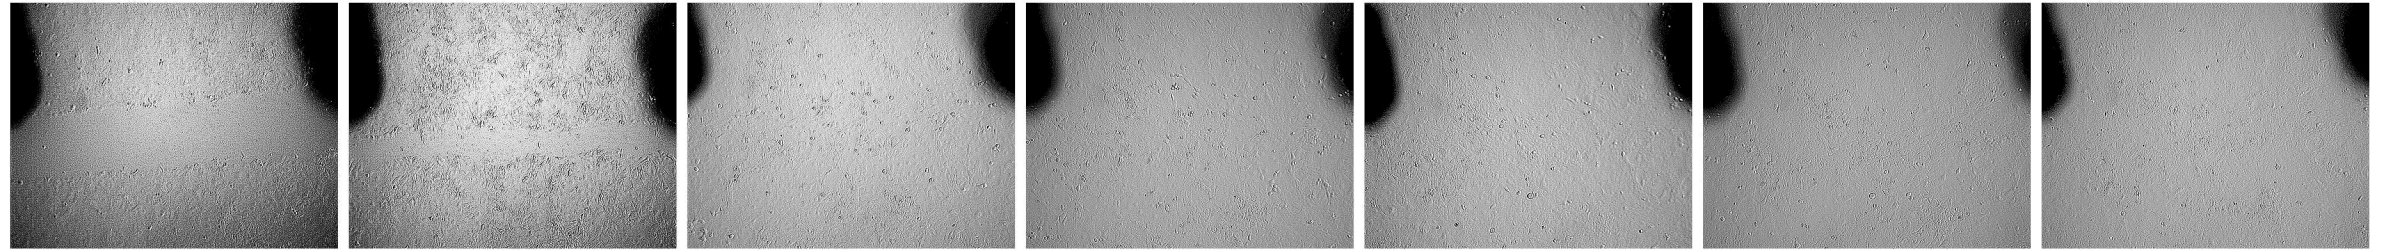

0.5uM GSK-343

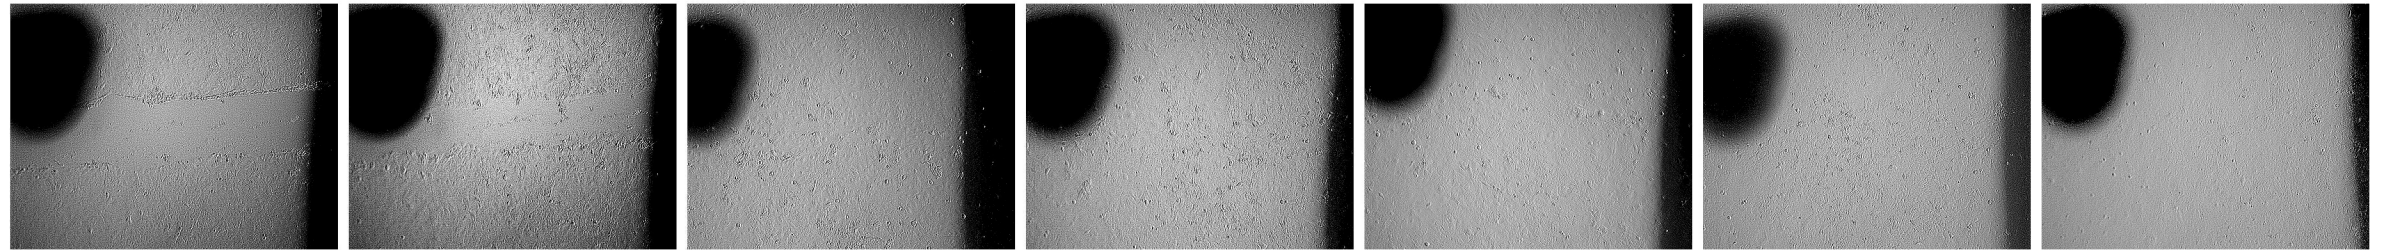

1.0uM DZNeP

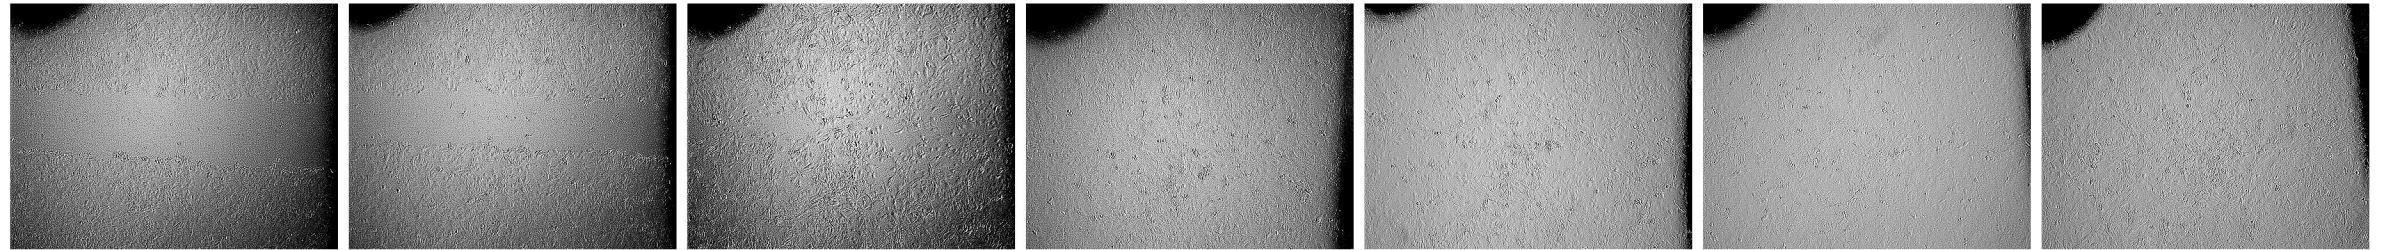

5.0uM EPZ-5687

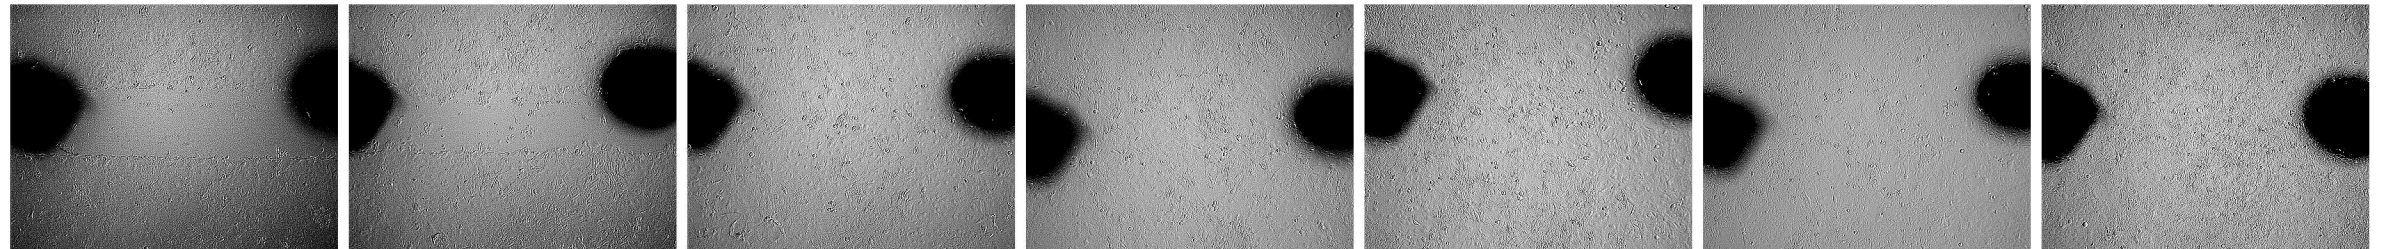

Supplemental Figure 5:

Wound healing assay SCC-47 0 hours to 72 hour timeline all time points. Wound made 5 days after treatment with inhibitor.

# SCC-104

0 Hours

12 Hours

24 Hours

36 Hours

48 Hours

60 Hours

72 Hours

No Treatment

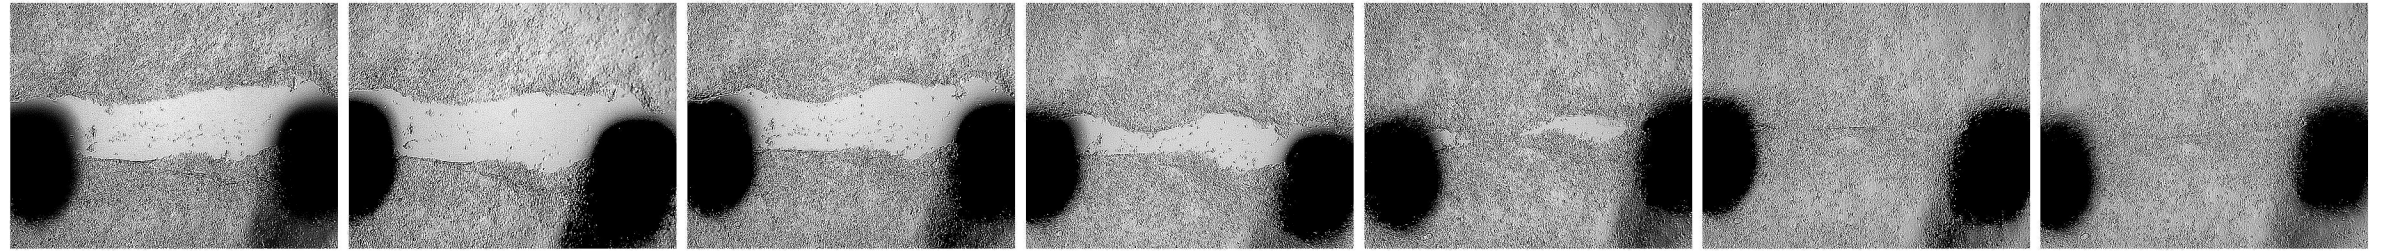

DMSO

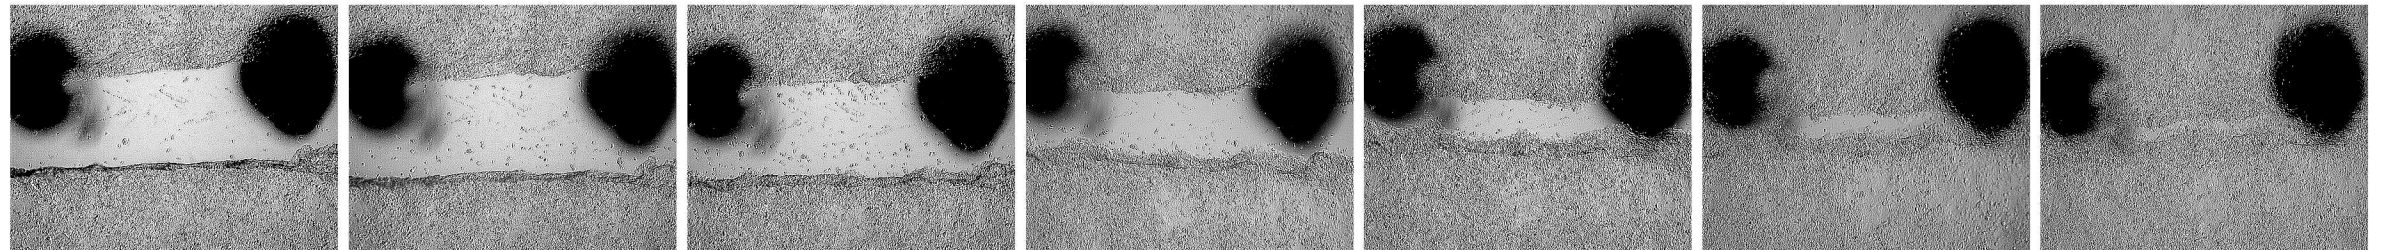

0.5uM GSK-343

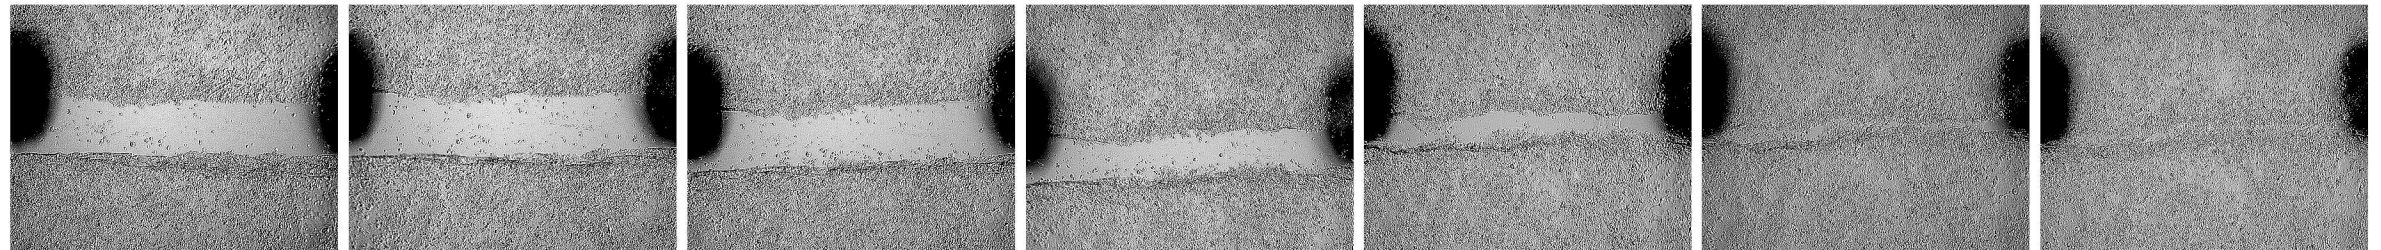

1.0uM DZNeP

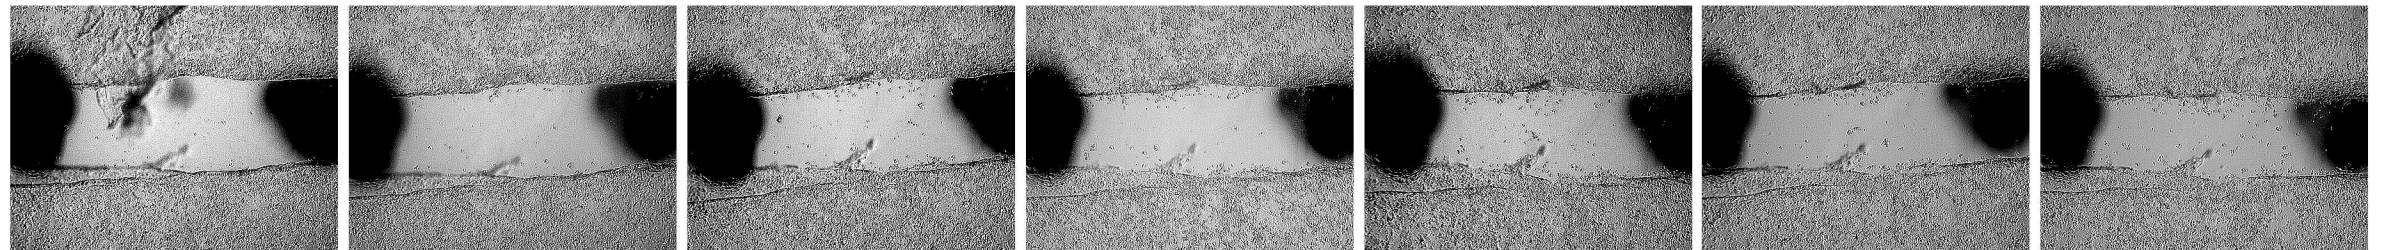

5.0uM EPZ-5687

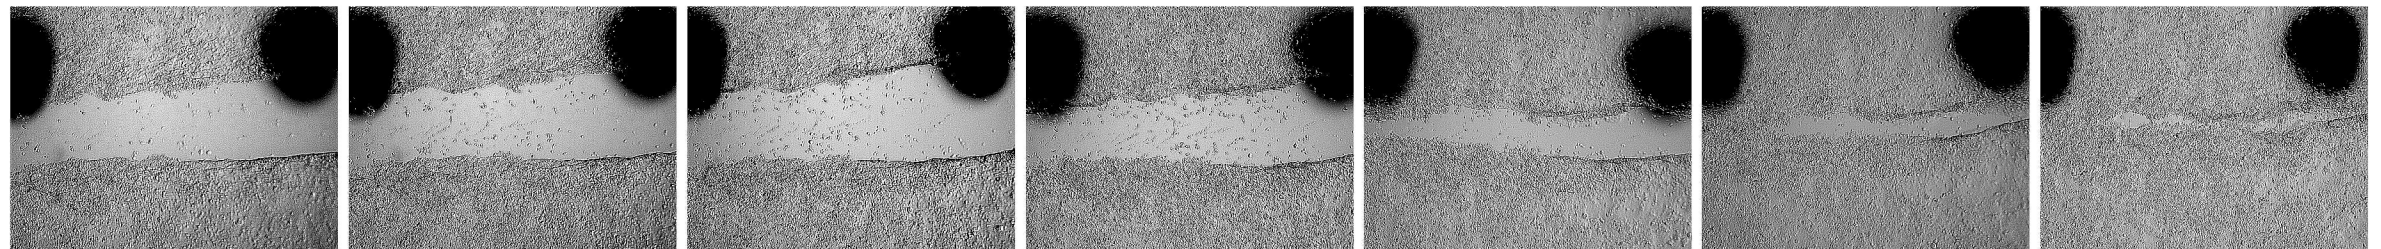

Supplemental Figure 6:

Wound healing assay SCC-104 0 hours to 72 hour timeline all time points. Wound made 5 days after treatment with inhibitor.

# SCC-1

0 Hours

12 Hours

24 Hours

36 Hours

48 Hours

60 Hours

72 Hours

No Treatment

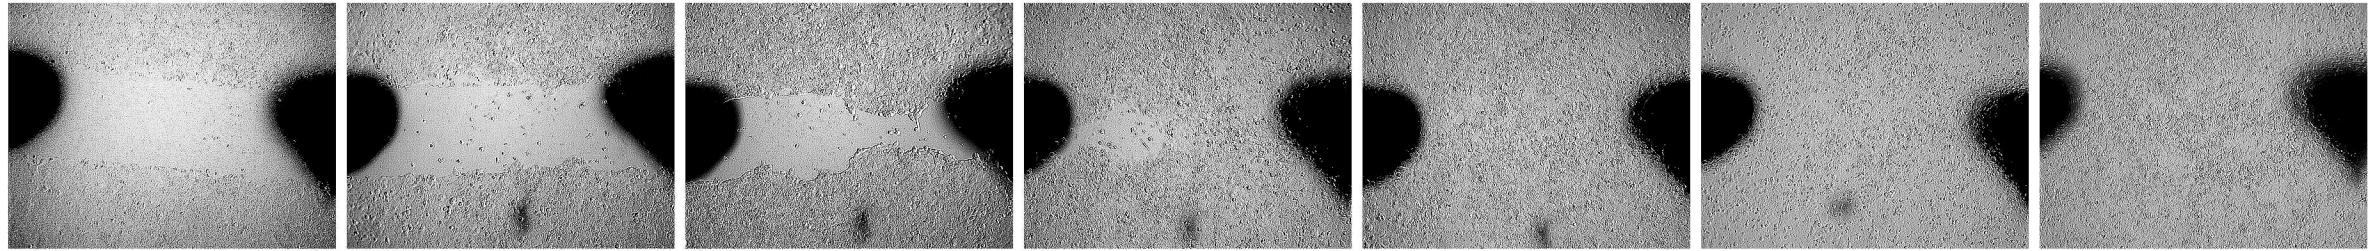

DMSO

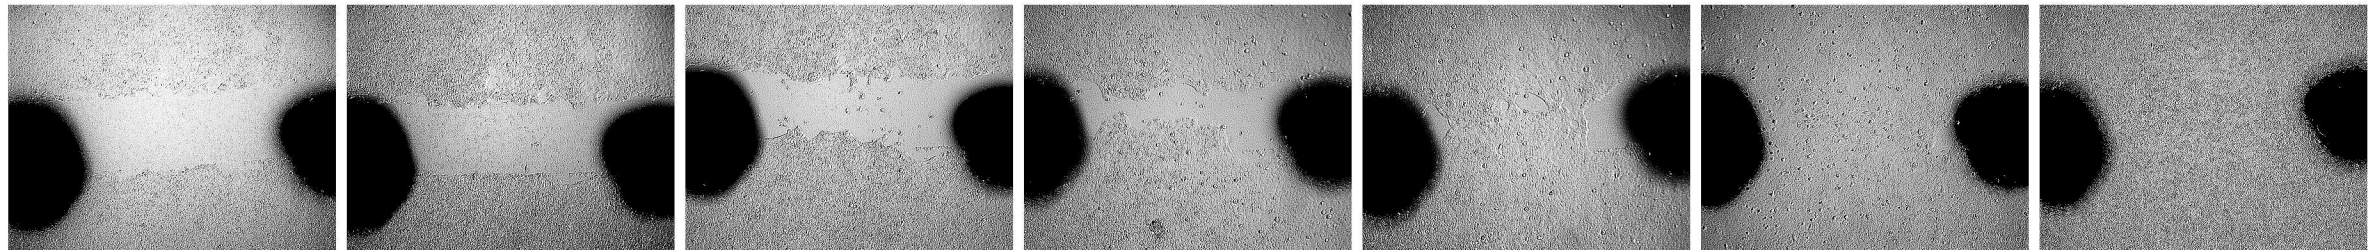

0.5uM GSK-343

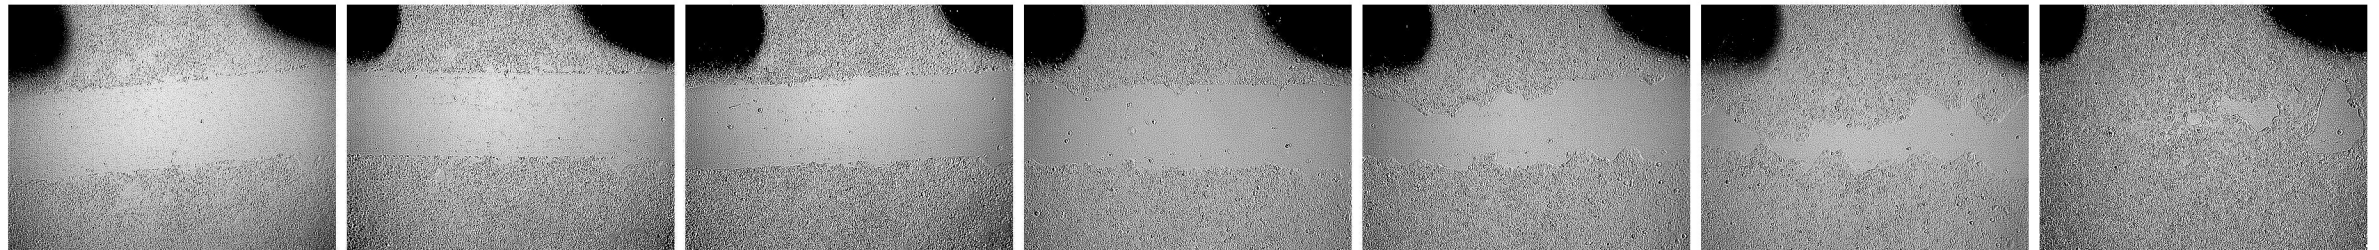

1.0uM DZNeP

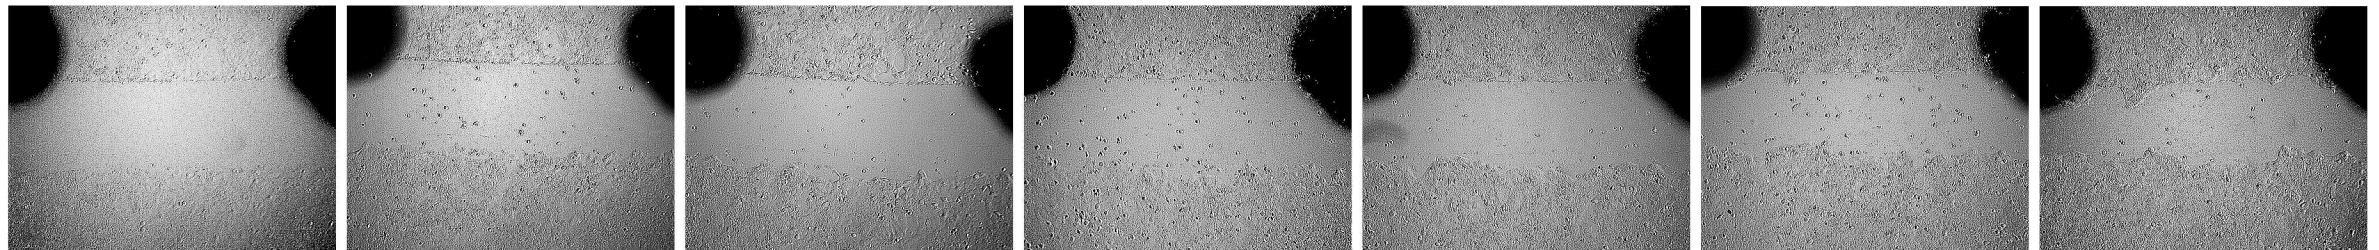

5.0uM EPZ-5687

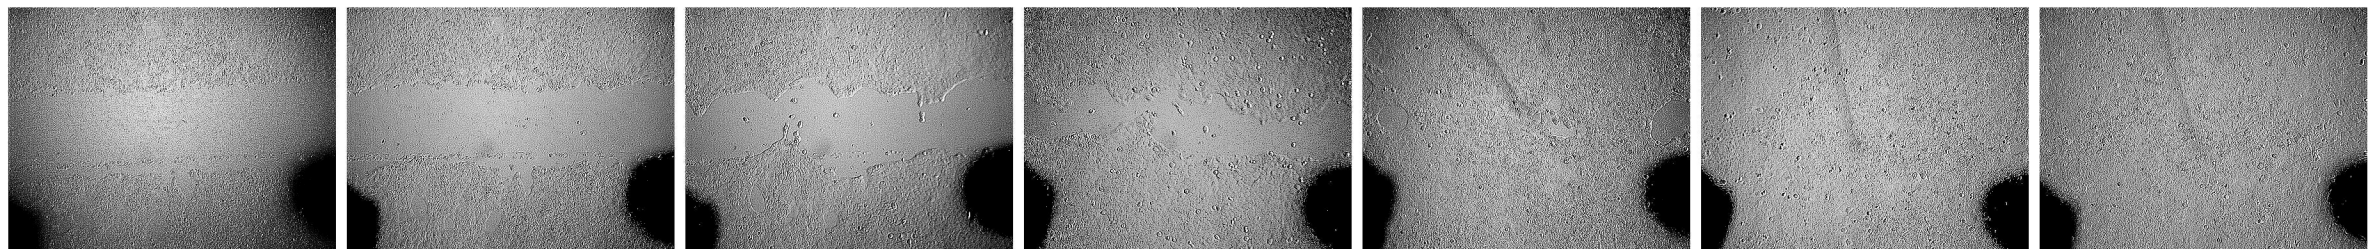

**Supplemental Figure 7:**

**Wound healing assay SCC-1 0 hours to 72 hour timeline all time points. Wound made 5 days after treatment with inhibitor.**

# SCC-9

0 Hours

12 Hours

24 Hours

36 Hours

48 Hours

60 Hours

72 Hours

No Treatment

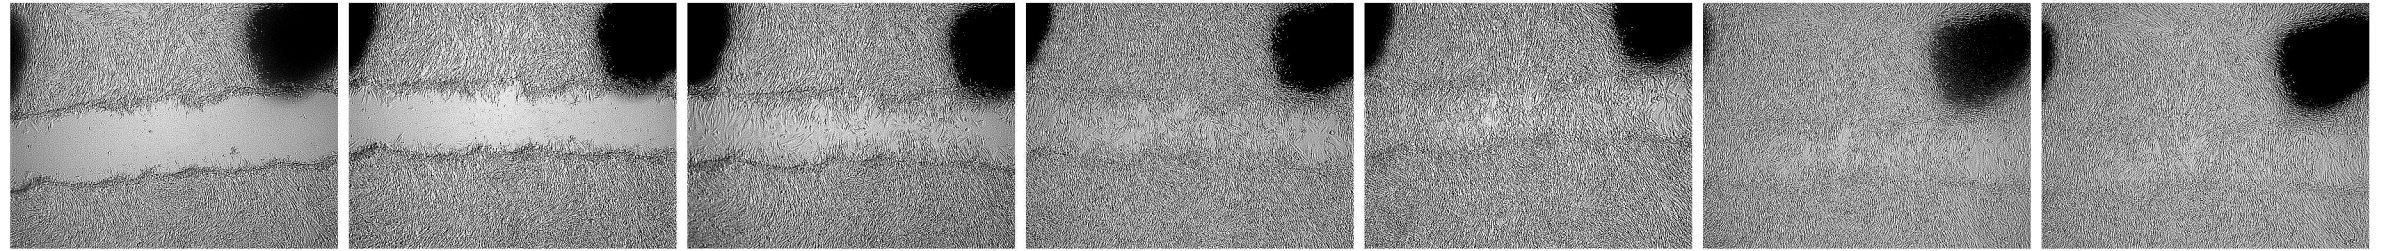

DMSO

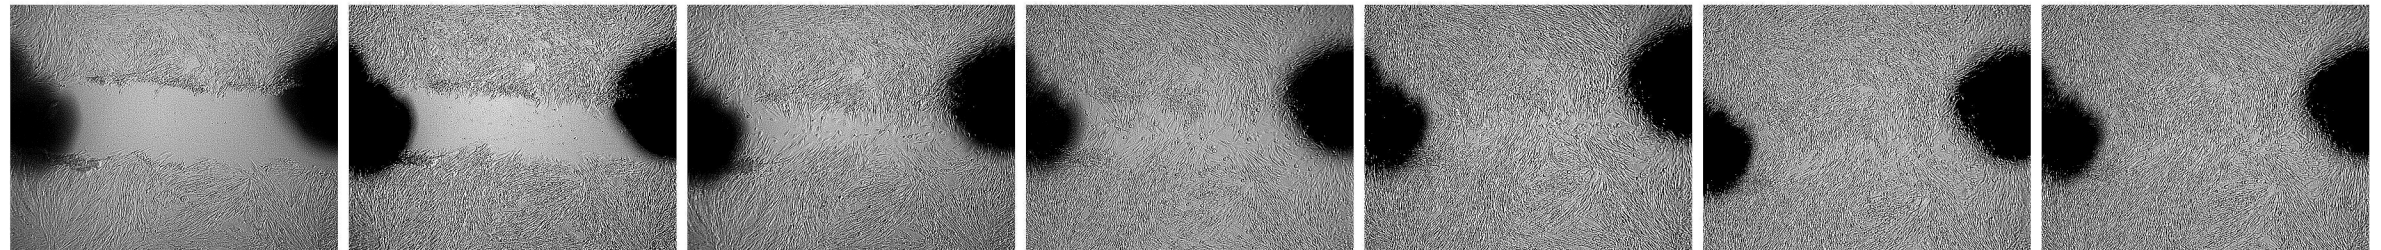

0.5uM GSK-343

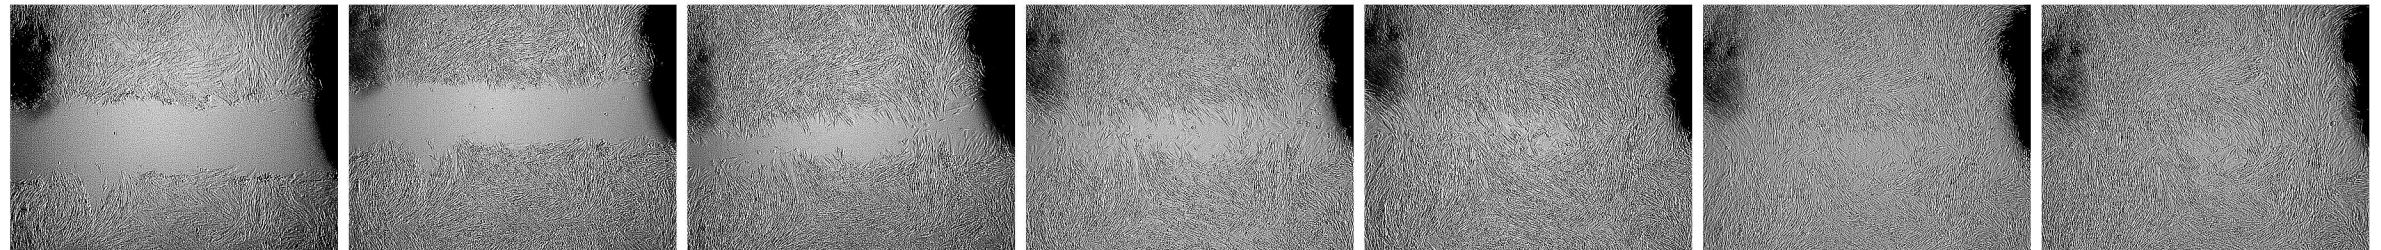

1.0uM DZNeP

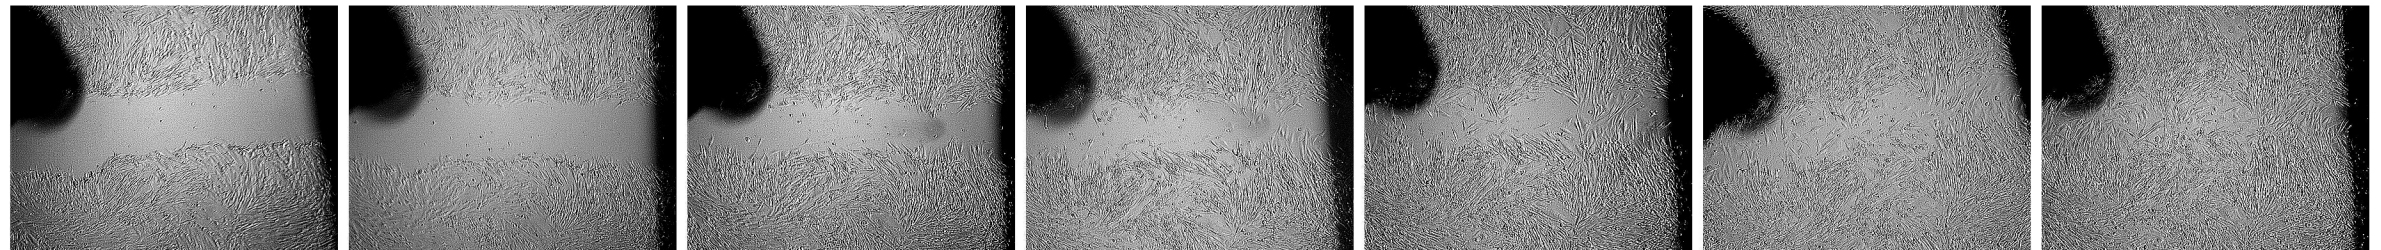

5.0uM EPZ-5687

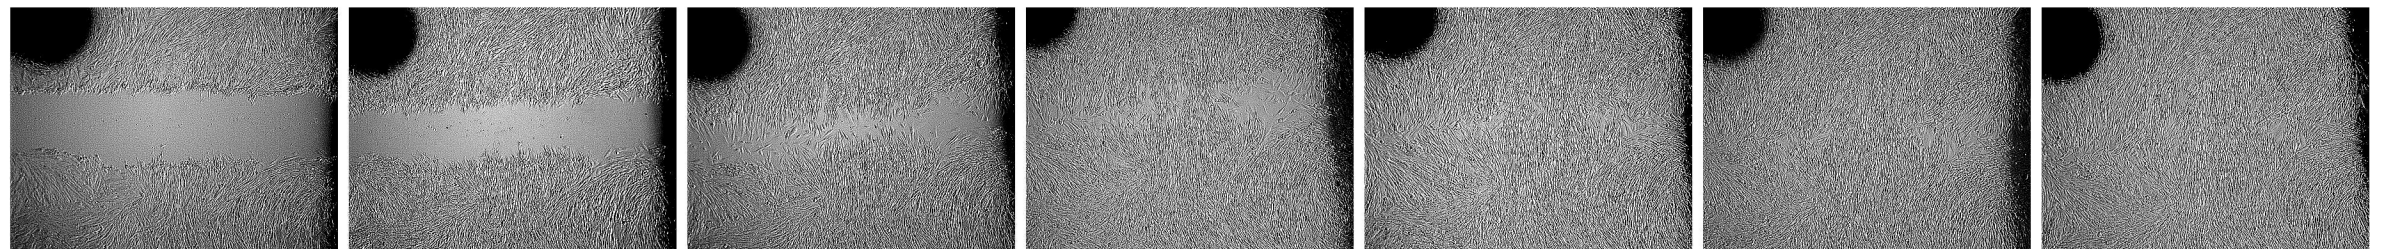

Supplemental Figure 8:

Wound healing assay SCC-9 0 hours to 72 hour timeline all time points. Wound made 5 days after treatment with inhibitor.
